# Supplementary material for: Three-Dimensional Heads-up Cataract Surgery Using Femtosecond Laser: Efficiency, Efficacy, Safety, and Medical Education—A Randomized Clinical Trial
Source: PubMed Central journal article supplement (PMC8340661; doi:10.1167/tvst.10.9.4), 2021-08-03
Supplement: tvst-10-9-4_s001.pdf [file tvst-10-9-4_s001.pdf]

**Supplementary Table S1.** Surgical technique (3D vs. TM) affecting the changes in perioperative parameters were analyzed with marginal linear regression models using the GEE.

| Parameters                                        | Regression coefficient | 95% Confidence Intervals         | p value |
|---------------------------------------------------|------------------------|----------------------------------|---------|
| Surgical time (second)                            | 0.02                   | (-0.02 to 0.06)                  | 0.37    |
| US power (%)                                      | 0.05                   | (-0.04 to 0.14)                  | 0.28    |
| APT (second)                                      | 0.05                   | (-0.08 to 0.18)                  | 0.47    |
| EPT (second)                                      | 0.05                   | (-0.16 to 0.26)                  | 0.65    |
| Visual acuity (logMAR)                            |                        |                                  |         |
| preoperative UDVA                                 | 0.07                   | (-0.06 to 0.21)                  | 0.30    |
| 1 day postoperative UDVA                          | 0.06                   | (-0.16 to 0.27)                  | 0.62    |
| 1 week postoperative UDVA                         | -0.13                  | (-0.43 to 0.17)                  | 0.39    |
| Intraocular pressure (mmHg)                       |                        |                                  |         |
| preoperative                                      | $8.0 \times 10^{-4}$   | (-0.05 to 0.05)                  | 0.97    |
| 1 day postoperative                               | -0.04                  | (-0.11 to 0.03)                  | 0.26    |
| 1 week postoperative                              | 0.03                   | (-0.06 to 0.11)                  | 0.50    |
| Endothelial cell density (cells/mm <sup>2</sup> ) |                        |                                  |         |
| preoperative                                      | 0.02                   | (-0.02 to 0.05)                  | 0.33    |
| 1 day postoperative                               | $4.4 \times 10^{-3}$   | (-0.04 to 0.05)                  | 0.86    |
| 1 week postoperative                              | 0.04                   | (-0.04 to 0.11)                  | 0.35    |
| Endothelial cell loss (%)                         |                        |                                  |         |
| ECL at 1 day                                      | 0.02                   | (-0.29 to 0.33)                  | 0.91    |
| ECL at 1 week                                     | 0.06                   | (-0.27 to 0.39)                  | 0.74    |
| Central corneal thickness ( $\mu\text{m}$ )       |                        |                                  |         |
| preoperative                                      | 0.01                   | ( $-4.0 \times 10^{-5}$ to 0.02) | 0.05    |
| 1 day postoperative                               | 0.01                   | (-0.01 to 0.03)                  | 0.56    |
| 1 week postoperative                              | 0.01                   | ( $-4.1 \times 10^{-3}$ to 0.02) | 0.21    |

*Note.* 3D = 3D heads-up cataract surgery; TM = traditional microscopic cataract surgery; GEE = generalized estimating equations; US = ultrasound; APT = absolute phacoemulsification time; EPT = effective phacoemulsification time; LogMAR = logarithm of the minimum angle of resolution; UDVA = uncorrected distance visual acuity; ECL = endothelial cell loss. Preoperative, intraoperative and 1 day postoperative group size is 117 eyes for 3D group and 125 eyes for TM group. One week postoperative group size is 109 eyes for 3D group and 111 eyes for TM group. TM is used as the reference category in the GEE approach.
